# Supplementary material for: Regulation of the ERK signalling pathway in the developing mouse blastocyst
Source: Oxford University Press journal article supplement (doi:10.1242/dev.177139), 2019-07-15
Supplement: dev177139supp.pdf [file dev177139supp.pdf]

## Supplementary Information

## Supplementary Figure 1

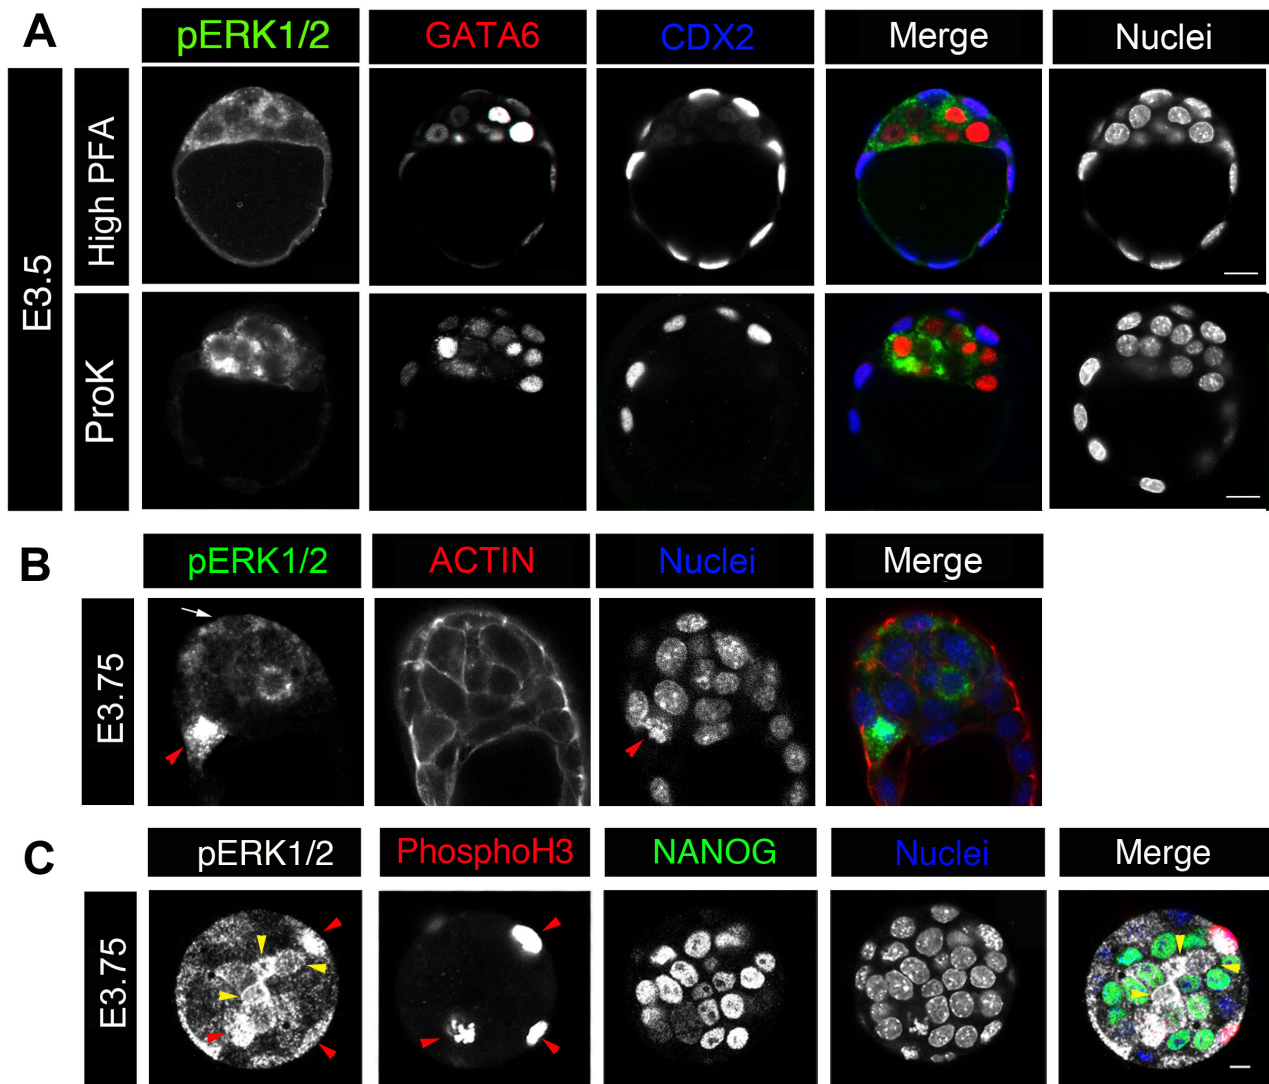

**Figure S1.** pERK labelling in blastocysts. **A.** Parallel staining of pERK, GATA6 and CDX2 with the High PFA and ProK protocols. **B.** ERK phosphorylation at E3.75 with signal in the TE (arrow) and ICM. The red arrowhead points toward a mitotic cell. **C.** Section through the ICM of an E3.75 embryo, stained with antibodies against pERK, NANOG and phospho-Histone3 to detect mitotic cells (n=8). Yellow arrowheads indicate cytoplasmic pERK while red arrowheads indicate nuclear pERK. Nuclear pERK cells are labelled by phospho-Histone3. Scale bars: 10 microns.

## Supplementary Figure 2

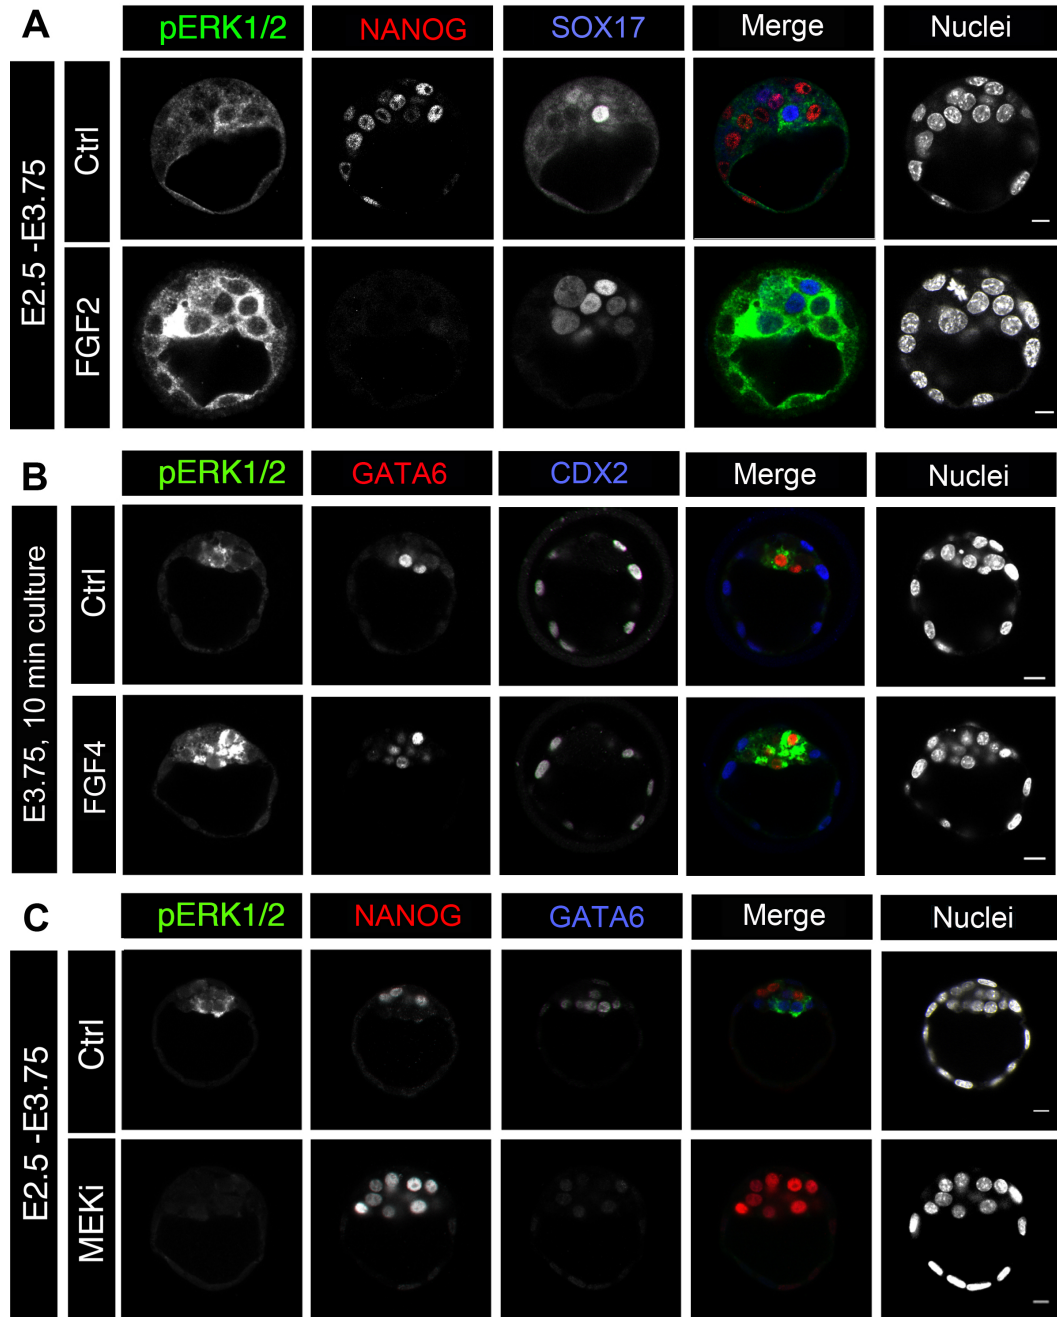

**Figure S2.** Validation of pERK staining in blastocysts. A, B. ERK phosphorylation after embryo cultures with FGF for 30h (A) (Ctrl, n=21; FGF4 n=22) or 10 min (B) (Ctrl, n=12; FGF4 n=14). C. pERK immunostaining after cultures with MEK inhibitor (Ctrl, n=18; MEK or MEK+FGFR inhibitors, n=18). Scale bars: 10 microns.

### Supplementary Figure 3

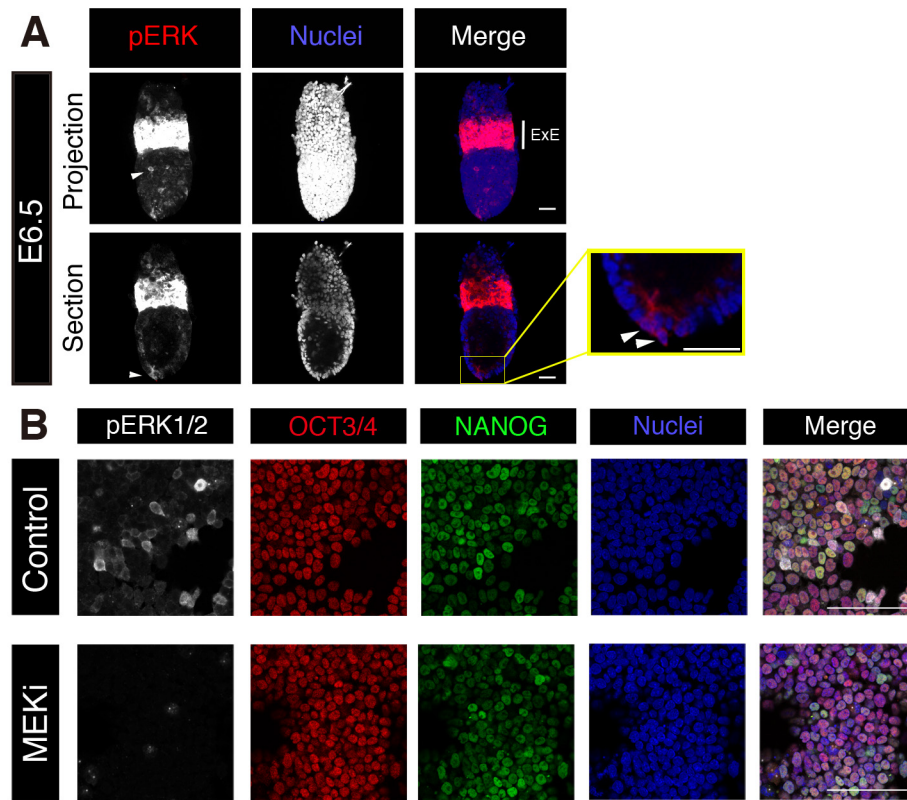

**Figure S3:** pERK immunostaining after implantation and in ES cells. **A.** ERK phosphorylation at E6.5 with a strong labelling in the extraembryonic ectoderm (ExE) and a weaker labelling in some PrE cells (arrowheads). The right panel is a magnification of the boxed area to show outside (VE) pERK-labelled cells (arrowheads). **B.** ERK phosphorylation in ES cells, co-stained with OCT3/4 and NANOG, cultured in absence (top panel) or presence (bottom panel) of the MEK inhibitor. Scale bars: 10 (A) and 100 (C) microns.

## Supplementary Figure 4

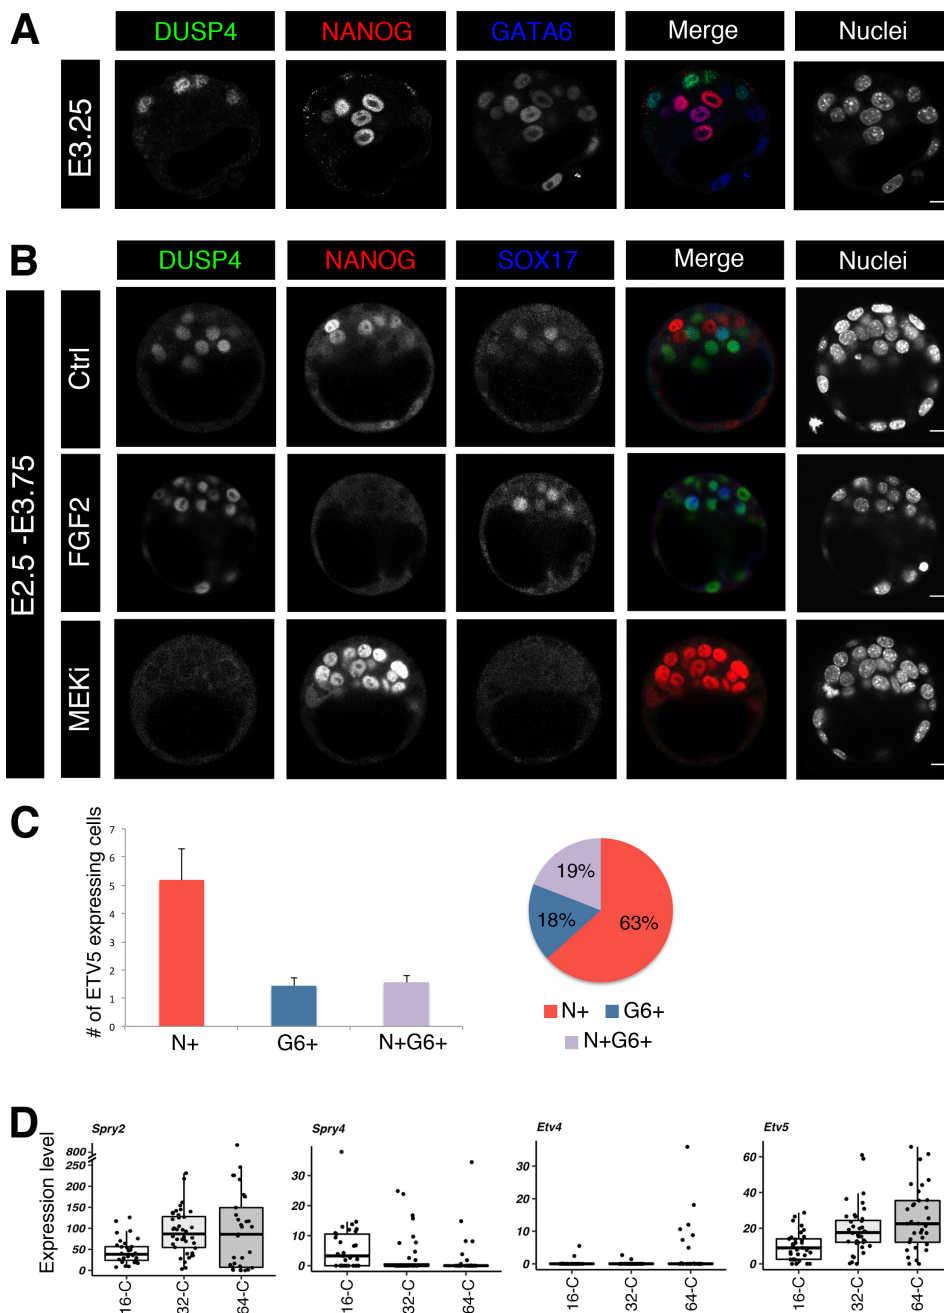

**Figure S4.** Expression of factors related to the FGF pathway. **A.** DUSP4, NANOG and GATA6 detection at E3.25 (n=15). **B.** DUSP4, NANOG and SOX17 immunolabelling in embryos cultured with either MEK inhibitor or FGF2 from E2.5 to E3.75 (Ctrl, n=20; FGF2, n= 15; MEK or MEK+FGFR inhibitors, n= 22). Scale bars: 10 microns. **C.** Number of cells labelled by ETV5 per embryo at E3.5-E3.75 (n=16 embryos) and their distribution between precursor (N+G6+), Epi (N+) or PrE cells (G6+). Data are represented as mean ± SEM. **D.** Expression of indicated genes by single-cell RNA-seq extracted from (Posfai et al., 2017) at the 16-cell stage (33 inner cells), E3.25 (32-C, 40 ICM cells) and E3.5 (64-C, 33 ICM cells). Expression levels are in RPKM.

**Table S1:** List of primary antibodies used

| Epitope    | Host   | Supplier       | Reference  | Dilution |
|------------|--------|----------------|------------|----------|
| pERK       | rabbit | Cell Signaling | 4370       | 1/50     |
| GATA6      | goat   | R&D            | AF1700     | 1/300    |
| pHistone 3 | rabbit | Millipore      | 06-570     | 1/100    |
| NANOG      | rabbit | Abcam          | ab80892    | 1/100    |
| NANOG      | rat    | e-bioscience   | 14-5761    | 1/100    |
| DUSP4      | rabbit | Abcam          | ab216576   | 1/100    |
| ETV5       | rabbit | Proteintech    | 13011-1-AP | 1/100    |
| SOX17      | goat   | R&D            | AF1924     | 1/100    |
| CDX2       | mouse  | Abcam          | ab89949    | 1/1      |
| OCT3/4     | mouse  | SantaCruz      | Sc-5279    | 1/100    |

**Table S2:** list of primers used for the single-cell RTqPCR

| RefSeq #            | Gene         | Forward               | Reverse                |
|---------------------|--------------|-----------------------|------------------------|
| NM_176933.4         | <i>Dusp4</i> | AGTCCTGGTTCATGGAAGC   | ACTCAAAGCCTCCTCCAGC    |
| <b>NM_001316365</b> | <i>Etv4</i>  | GCAGGGAAAGCTCATGGAC   | GAGCCACGTCTCTTGGAAGT   |
| NM_023794           | <i>Etv5</i>  | CAGAACCTGGATCACAGCAA  | GACTGAGGAGGGAAGGGATG   |
| NM_010202           | <i>Fgf4</i>  | ACTACCTGCTGGGCCTCAA   | ACTCCGAAGATGCTCACCAC   |
| NM_001079908        | <i>Fgfr1</i> | GCTATAACCCCAGCCACAAC  | AGCCAAAGTCTGCGATCTTC   |
| NM_010207           | <i>Fgfr2</i> | CACCAACTGCACCAATGAAC  | GAATCGTCCCCTGAAGAACA   |
| NM_001163485        | <i>Rpl30</i> | AGTCTCTGGAGTCGATCAACT | AGCCAGTGTGCATACTCTGTAG |
| NM_009092           | <i>Rps17</i> | ATGACTTCCACACCAACAAGC | GCCAACTGTAGGCTGAGTGAC  |
